# Supplementary material for: Cas12a/crRNA recognition initiated self-priming mediated chain extension for colorimetric cell-free DNA (cfDNA) analysis
Source: Royal Society of Chemistry journal article supplement (doi:10.1039/d4an01432d), 2024-12-04
Supplement: d4an01432d1.pdf [file d4an01432d1.pdf]

## Supporting information

**Table. S1.** Oligonucleotide sequences used in this study.

| Title    | Sequence (5' to 3')                                                                                                                                                               |
|----------|-----------------------------------------------------------------------------------------------------------------------------------------------------------------------------------|
| BRCA-1   | GAA CAA AAG GAA GAA AAT CA                                                                                                                                                        |
| H1       | AAC ATC ATG TGA TAC AAT TAT TAA CAA GGA ACG ACC<br>CAA GUA GCU UAU CAG ACU GAU GUU GA                                                                                             |
| H2       | SH-AAA ATT TTT CG TCA ACA TCA GTC TGA TTT TAA GCT<br>ATG TTG -FAM                                                                                                                 |
| crRNA    | UAA UUU CUA CUC UUG UAG AUG AUU UUC UUC CUU UUG<br>UUC A                                                                                                                          |
| “2”      | UGA GGU AGU AGG UUG UAU AGU U                                                                                                                                                     |
| DH probe | A*A*G* A*A*T* T*C*T* T*A*A* G*A*A* T*T*C* T*T*<br>TCA ACA TCA CCG ACC TTC CAC CGA GCT AGA TCC CTG<br>GAC GAC TTG AAA AAC TAT ACA ACC TAC TAC CTC A TTT<br>CAA GTC GTC CAG TTG AAA |

### Supplemented experimental section:

#### *Cell culture and cfDNA extraction*

MCF-7 cells were grown in Dulbecco's modified Eagle medium (DMEM) containing 10% fetal bovine serum (FBS), 100 U/mL penicillin, and 100 g/mL streptomycin at 37 °C in a 5% CO<sub>2</sub> humidified atmosphere. HEK293 cells were grown in RPMI 1640 medium supplemented with 10% FBS, 100 U/mL penicillin, and 100 g/mL streptomycin at 37 °C in a humidified 5% CO<sub>2</sub> atmosphere. Applied Biosystems MagMAX free DNA extraction kit was used to extract the cfDNA from the cell culture fluid. The extraction procedure refers to the instruction of the kit.

#### *Immobilization of H0 probe on the surfaces of SMBs*

The surfaces of MBs were labeled with H0 probe as follows, First, 5 µl H0 probe was mixed with 37.5 µl 1× PBS and prehybridized with a PCR machine (90 °C for 5 min, cooled to 4 °C at a speed of 4 °C/min). Then MBs (10 µl, 10 mg/ml) were washed three times with washing buffer and diluted to 1 mg/ml. H0 probe (10 µl) was added to the diluted MB solution and mixed for 30 min at room temperature, followed by magnetic separation of the H0@MBs. The H0@MBs complexes obtained were washed twice with washing solution.

#### *pp Probe Preparation*

pp Probe was prepared according to a previously reported procedure; its spectra were in accordance with those described <sup>1</sup>. HR-FAB MS: calculated m/z 727.2350, found 727.2353; FTIR (KBr/cm): 3450, 2970, 1600, 1588, 1465, 1354, 1147.

#### *Statistical analysis*

All data collected in the research were shown as mean ± standard deviations. The two-tailed Student's t test was used to obtain the differences between two groups and P <

0.01 was used to evaluate the significance.

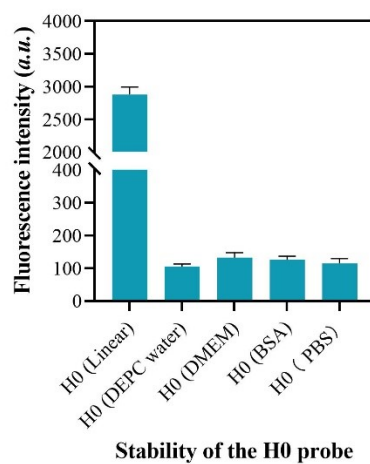

**Figure S1.** Fluorescence intensity of the H0 probe when mixed with different buffer solutions.

#### References:

1. Pandith, A.; Seo, Y. J., Label-free sensing platform for miRNA-146a based on chromo-fluorogenic pyrophosphate recognition. *J. Inorg. Biochem.* **2020**, *203*, 110867.
